# Supplementary material for: Hydrological Regime and Water Shortage as Drivers of the Seasonal Incidence of Diarrheal Diseases in a Tropical Montane Environment
Source: PLOS journal article supplement (doi:10.1371/journal.pntd.0005195), 2016-12-09
Supplement: S3 (10.1371/journal.pntd.0005195.s003) [file journal.pntd.0005195.s003]

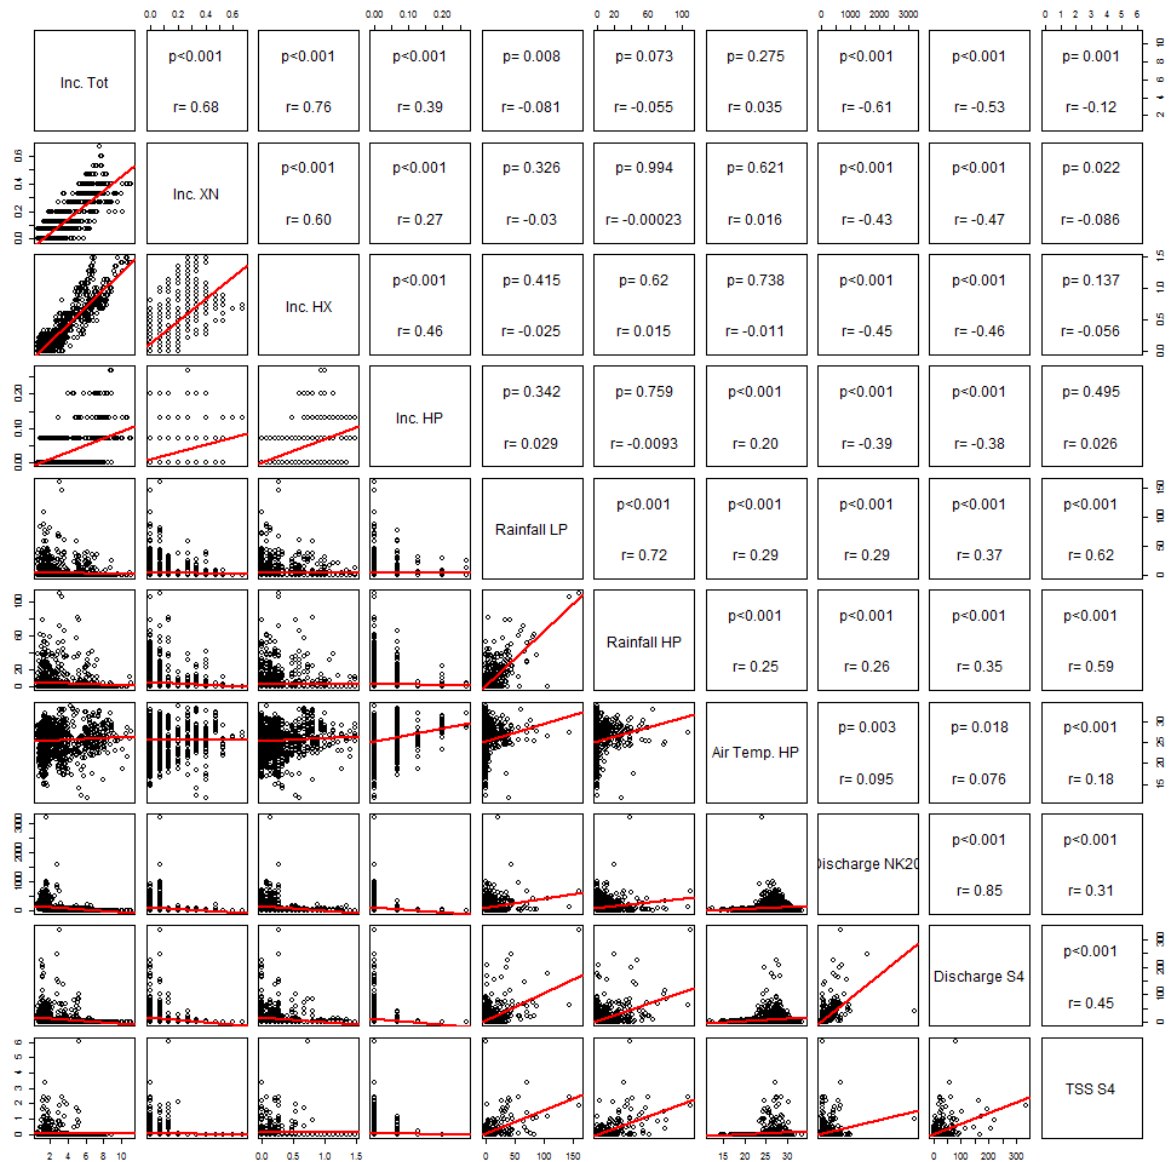

S3 Fig. Spearman coefficient of correlation between 15-days moving average of reported diarrheal diseases cases (i.e., hospital admissions or incidence) at 4 spatial subsets (See Fig. SI1 for full details), daily rainfall (mm) records at two locations (Luang Prabang Airport and Houay Pano catchment) and daily air temperature ( $^{\circ}\text{C}$ ) record across the Houay Pano catchment, daily discharge records at two gauging stations (NK20 on the Nam Khan in  $\text{m}^3 \text{s}^{-1}$  and S4 on the Houay Pano in  $\text{L s}^{-1}$ ) and daily total suspended sediments ( $\text{g L}^{-1}$ ) records at the S4 sampling station, from 2010 to 2012.
