# Supplementary material for: Hydrological Regime and Water Shortage as Drivers of the Seasonal Incidence of Diarrheal Diseases in a Tropical Montane Environment
Source: PLOS journal article supplement (doi:10.1371/journal.pntd.0005195), 2016-12-09
Supplement: S7 (10.1371/journal.pntd.0005195.s007) [file journal.pntd.0005195.s007]

S3 Table. Villagers interview matrix.

**Social representations of vulnerability to water contaminations during floods and coping strategies.**

**Luang Prabang District, Laos.**

Main objectives of the interview grid:

- Evaluate and create a hierarchy of perceived environmental risks inside the village and in the fields
- Collect qualitative information to determine how villagers feel vulnerable to the risk of water related disease, and which coping strategies adopted.

| Themes/ Objectives                                                                                                                                                                                                                                                                                                             | Questions                                                                                                                                                                                                                                                                                                                                                                                                                                                                                                                                                                                                                                                                                                                                                                                                                                                                                                                                                                                                                                                                                                                                                                                                                                                                                                                     |
|--------------------------------------------------------------------------------------------------------------------------------------------------------------------------------------------------------------------------------------------------------------------------------------------------------------------------------|-------------------------------------------------------------------------------------------------------------------------------------------------------------------------------------------------------------------------------------------------------------------------------------------------------------------------------------------------------------------------------------------------------------------------------------------------------------------------------------------------------------------------------------------------------------------------------------------------------------------------------------------------------------------------------------------------------------------------------------------------------------------------------------------------------------------------------------------------------------------------------------------------------------------------------------------------------------------------------------------------------------------------------------------------------------------------------------------------------------------------------------------------------------------------------------------------------------------------------------------------------------------------------------------------------------------------------|
| <p><b><u>Occupation of the respondent</u></b></p> <p>Objectives :</p> <ol style="list-style-type: none"> <li>1) Evaluate the socio-economic level of the interviewee</li> <li>2) Evaluate his he/she has a position in the village</li> </ol>                                                                                  | <ul style="list-style-type: none"> <li>- How old are you?</li> <li>- How many children do you have? Do they still live in your house ? Do they work?</li> <li>- How long have you been living in the village for? Are you a newcomer? Why did you move here ?</li> <li>- Can you go easily in Luang Prabang or in other villages ? In which villages do you go, and why? (family, work...). Which way of transport do you use ?</li> <li>- Do you stand for a special position in the village ? If yes, why do you have this position? (age, wealth, gender, job...)</li> </ul>                                                                                                                                                                                                                                                                                                                                                                                                                                                                                                                                                                                                                                                                                                                                               |
| <p><b><u>Water uses and practices inside and outside the village</u></b></p> <p>Objectives:</p> <ol style="list-style-type: none"> <li>1) Get indications on the possible moments and places of exposition to contaminations</li> <li>2) Contextualize the feelings of vulnerability according to spatial criterion</li> </ol> | <ul style="list-style-type: none"> <li>- <b><u>In the village</u></b></li> <li>- Where are the important places in the village ?</li> <li>- Are all the water good to drink here?</li> <li>- What kind of water do you use, in the rainy season / In the dry season? <ul style="list-style-type: none"> <li>o To drink</li> <li>o To cook</li> <li>o To wash (dishes, clothes...)</li> <li>o To take a shower</li> <li>o For your animals</li> </ul> </li> <li>- Do you have water in your house (= nam lin) ? Since when ? <ul style="list-style-type: none"> <li>o Is it expensive ?</li> <li>o Is it working well ?</li> </ul> </li> <li>- Is there a place where it is more dangerous to get sick because of water ?</li> <li>- Do you go to the river sometimes ? What for? Is there somewhere where it's polluted ? How do you know it's polluted ?</li> <li>- <b><u>In the Fields</u></b></li> <li>- What do you grow? why ? (subsistence/cash crops )</li> <li>- Do you think that your surrounding environment has changed in the last years? Why ? Advantages ? Inconvenients ?</li> <li>- Who comes and work with you when you are in the fields ?</li> <li>- What kind of difficulties do you face in your daily work?</li> <li>- Are there any special risks regarding your farming activity? If yes,</li> </ul> |

|                                                                                                                                                                                                                                                                                   |                                                                                                                                                                                                                                                                                                                                                                                                                                                                                                                                                                                                                                                                                                                                                                                                                                                                                                                                                                                                                                                                                                                                                                                                                                                              |
|-----------------------------------------------------------------------------------------------------------------------------------------------------------------------------------------------------------------------------------------------------------------------------------|--------------------------------------------------------------------------------------------------------------------------------------------------------------------------------------------------------------------------------------------------------------------------------------------------------------------------------------------------------------------------------------------------------------------------------------------------------------------------------------------------------------------------------------------------------------------------------------------------------------------------------------------------------------------------------------------------------------------------------------------------------------------------------------------------------------------------------------------------------------------------------------------------------------------------------------------------------------------------------------------------------------------------------------------------------------------------------------------------------------------------------------------------------------------------------------------------------------------------------------------------------------|
|                                                                                                                                                                                                                                                                                   | <p>how do you cope with it?</p> <ul style="list-style-type: none"> <li>- In the fields, what kind of water do you use? <ul style="list-style-type: none"> <li>o For irrigation/Animals</li> <li>o For Cooking</li> <li>o For Drinking</li> </ul> </li> <li>- How do you make a difference between which water is good to drink and which is not ?</li> </ul>                                                                                                                                                                                                                                                                                                                                                                                                                                                                                                                                                                                                                                                                                                                                                                                                                                                                                                 |
| <p><b><u>Water as an environmental risk</u></b></p> <p>Objectives :</p> <ol style="list-style-type: none"> <li>1) Evaluate the capacity of anticipation of risks: shortages or floods</li> <li>2) Evaluate the feeling of vulnerability towards floods</li> </ol>                 | <ul style="list-style-type: none"> <li>- Is there water all year long?</li> <li>- What do you do if there is a shortage? (cooking? Washing? Shower? Animals?)</li> <li>- How do you protect yourself and your family?</li> <li>- Are there floods sometimes?</li> <li>- What do you do if there is a shortage? (cooking? Washing? Shower? Animals?)</li> <li>- How do you protect yourself and your family?</li> <li>- How big is the river when it's « normal » ? When it's dry ? Flooded ?</li> <li>- What is the impact of floods on your fields ?</li> </ul>                                                                                                                                                                                                                                                                                                                                                                                                                                                                                                                                                                                                                                                                                             |
| <p><b><u>Water contaminations and health risks</u></b></p> <p>Objectives:</p> <ol style="list-style-type: none"> <li>1) Understand how water related diseases are perceived</li> <li>2) Evaluate what are the health practices used to protect from important diseases</li> </ol> | <ul style="list-style-type: none"> <li>- Are the people in your family often sick ?</li> <li>- How did you get cured ? (traditional healer, pharmacy, hospital? ) <ul style="list-style-type: none"> <li>o Is it expensive? Are you sometimes reluctant to go there because of money ?</li> <li>o Where can you buy medicines ?</li> <li>o in the village?</li> <li>o In the market?</li> <li>o In Luang Prabang?</li> </ul> </li> <li>- Do you always go buy your medicine at the same place? Why?</li> <li>- Why are you getting sick ? (mosquitoes, water, air, meat...)</li> <li>- When are those diseases dangerous ?</li> <li>- How can you protect yourself ?</li> <li>- If someone is getting sick in the village, who can take care of him/her ?</li> <li>- Is it easy to find people to help you in the village?</li> <li>- Are you sometimes sick because of water? <ul style="list-style-type: none"> <li>o Which water? (cooking, cleaning, shower, drinking)...</li> <li>o Where? (house/village/fields...)</li> <li>o Which ^period of year?</li> </ul> </li> <li>- How can you protect yourself in order not to be sick because of water? <ul style="list-style-type: none"> <li>o What can you do when you are sick?</li> </ul> </li> </ul> |
